# Supplementary material for: Metabolomic signature associated with reproduction-regulated aging in Caenorhabditis elegans
Source: publisher site journal article supplement (doi:10.18632/aging.101170), 2017-02-06
Supplement: Supplementary file 1 [file aging-v9i2-101170-supplementary-material-SD1.pdf]

SUPPLEMENTARY INFORMATION

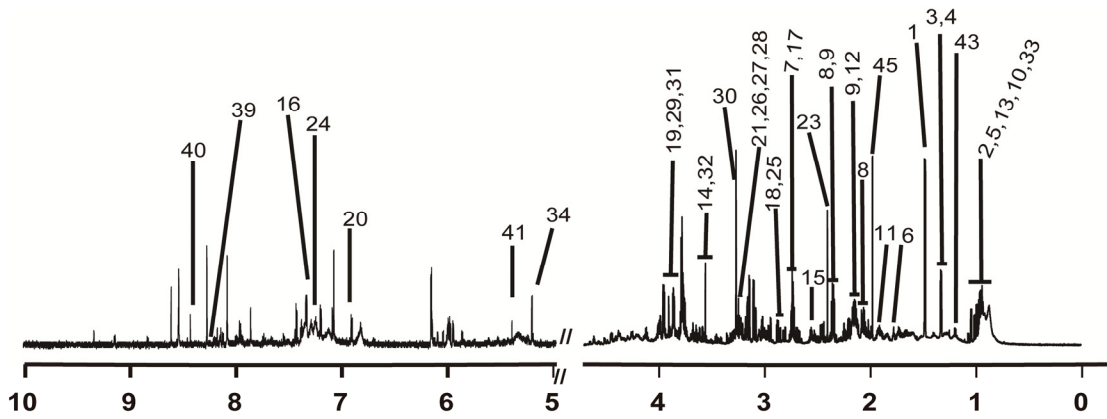

Figure S1. Typical 800MHz <sup>1</sup>H NMR spectra of *C. elegans*. Metabolites keys were showed in the Table S1 (supplemental information).

Table S1. <sup>1</sup>H and <sup>13</sup>C NMR data for metabolites keys: GPC, glycerophosphocholine; GSSG, glutathione disulfide; #, not determined.

| keys | metabolites | moieties          | δ1H (multiplicity) | δ 13C |
|------|-------------|-------------------|--------------------|-------|
| 1    | alanine     | αH                | 3.77(q)            | 53.4  |
|      |             | βH                | 1.48(d)            | 19.1  |
| 2    | isoleucine  | αCH               | 3.65(d)            | 62.4  |
|      |             | βCH               | 1.97(m)            | 38.7  |
|      |             | γCH <sub>2</sub>  | 1.47(m)            | 27.4  |
|      |             | γ'CH <sub>3</sub> | 1.007(d)           | 17.6  |
|      |             | δCH <sub>3</sub>  | 0.94(t)            | 13.9  |
|      |             | εCH <sub>3</sub>  | 0.94(t)            | 13.9  |
| 3    | threonine   | αCH               | 3.58(d)            | 63.3  |
|      |             | βCH               | 4.25(m)            | 68.8  |
|      |             | γCH <sub>3</sub>  | 1.33(d)            | 22.3  |
| 4    | lactic acid | αCH               | 4.11(q)            | 71.4  |
|      |             | βCH               | 1.33(d)            | 23    |
| 5    | valine      | αCH               | 3.61(d)            | 63.2  |
|      |             | βCH               | 2.26(m)            | 31.9  |
|      |             | γCH <sub>2</sub>  | 1.04(d)            | 20.8  |
|      |             | γ'CH <sub>3</sub> | 0.99(d)            | 19.5  |
| 6    | lysine      | αCH               | 3.75(t)            | 57.5  |
|      |             | βCH <sub>2</sub>  | 1.82(m)            | 32.8  |
|      |             | γCH <sub>2</sub>  | 1.47(m)            | 24.3  |
|      |             | δCH <sub>2</sub>  | 1.72(m)            | 29.3  |
|      |             | εCH <sub>2</sub>  | 3.02(t)            | 41.9  |
| 7    | methionine  | αCH               | 3.86(t)            | 56.6  |
|      |             | βCH <sub>2</sub>  | 2.17(m)            | 33    |
|      |             | γCH <sub>2</sub>  | 2.64(t)            | 31.7  |
|      |             | εCH <sub>3</sub>  | 2.12(s)            | 16.8  |
| 8    | proline     | αCH               | 4.14(dd)           | 64    |
|      |             | βCH <sub>2</sub>  | 2.06(m)            | 31.9  |
|      |             | βCH <sub>2</sub>  | 2.35(m)            | 31.9  |
|      |             | γCH <sub>2</sub>  | 2.01(m)            | 26.6  |
|      |             | δCH <sub>2</sub>  | 3.42(m)            | 48.9  |
|      |             | δCH <sub>2</sub>  | 3.34(m)            | 48.9  |

| keys | metabolites                 | moieties                      | $\delta$ 1H (multiplicity) | $\delta$ 13C |
|------|-----------------------------|-------------------------------|----------------------------|--------------|
| 9    | glutamate                   | $\alpha$ CH                   | 3.75(m)                    | 57.5         |
|      |                             | $\beta$ CH <sub>2</sub>       | 2.07(m)                    | 29.8         |
|      |                             | $\beta$ CH <sub>2</sub>       | 2.15(m)                    | 29.8         |
|      |                             | $\gamma$ CH <sub>2</sub>      | 2.35(m)                    | 36.3         |
| 10   | $\alpha$ -aminobutyric acid | $\alpha$ CH                   | 3.71(t)                    | 58.7         |
|      |                             | $\beta$ CH <sub>2</sub>       | 1.91(m)                    | 26.6         |
|      |                             | $\gamma$ CH <sub>2</sub>      | 0.97(t)                    | 11.4         |
| 11   | acetic acid                 | CH <sub>3</sub>               | 1.91(s)                    | 26.2         |
| 12   | glutamine                   | $\alpha$ CH                   | 3.77(t)                    | 56.9         |
|      |                             | $\beta$ CH <sub>2</sub>       | 2.14(m)                    | 29.2         |
|      |                             | $\gamma$ CH <sub>2</sub>      | 2.45(m)                    | 33.7         |
| 13   | leucine                     | $\alpha$ CH                   | 3.76(t)                    | 56.3         |
|      |                             | $\beta$ CH <sub>2</sub>       | 1.71(m)                    | 42.6         |
|      |                             | $\gamma$ CH                   | 1.72(m)                    | 26.7         |
|      |                             | $\delta$ CH <sub>3</sub>      | 0.96(q)                    | 23.8         |
|      |                             | $\delta'$ CH <sub>3</sub>     | 0.95(q)                    | 24.9         |
| 14   | glycine                     | $\alpha$ CH                   | 3.55(S)                    | 44.3         |
| 15   | $\beta$ -alanine            | $\alpha$ CH <sub>2</sub>      | 2.55(t)                    | 36.42        |
|      |                             | $\beta$ CH <sub>2</sub>       | 3.17(t)                    | 39.4         |
| 16   | phenylalanine               | $\alpha$ CH                   | 3.99(dd)                   | 58.9         |
|      |                             | $\beta$ CH <sub>2</sub>       | 3.14(q)                    | 39.3         |
|      |                             | $\beta$ CH <sub>2</sub>       | 3.28(q)                    | 39.3         |
|      |                             | $\delta$ & $\delta'$ CH       | 7.38(m)                    | 130.5        |
|      |                             | $\epsilon$ & $\epsilon'$ CH   | 7.41(m)                    | 131.9        |
|      |                             | $\zeta$ CH                    | 7.31(d)                    | 129.7        |
| 17   | aspartic acid               | $\alpha$ CH                   | 3.89(dd)                   | 55           |
|      |                             | $\beta$ CH <sub>2</sub>       | 2.68(dd)                   | 39.4         |
|      |                             | $\beta$ CH <sub>2</sub>       | 2.81(dd)                   | 39.4         |
| 18   | asparagine                  | $\alpha$ CH                   | 3.98(dd)                   | 54.1         |
|      |                             | $\beta$ CH <sub>2</sub>       | 2.86(dd)                   | 37.4         |
|      |                             | $\beta$ CH <sub>2</sub>       | 2.95(dd)                   | 37.5         |
| 19   | serine                      | $\alpha$ CH                   | 3.84(dd)                   | 59.2         |
|      |                             | $\beta$ CH <sub>2</sub>       | 3.95(m)                    | 63.1         |
| 20   | tyrosine                    | $\delta$ CH, $\delta'$ CH     | 6.91(d)                    | 118.9        |
|      |                             | $\epsilon$ CH, $\epsilon'$ CH | 7.20(d)                    | 133.7        |
| 21   | arginine                    | $\alpha$ CH                   | 3.77(t)                    | 56.9         |
|      |                             | $\beta$ CH <sub>2</sub>       | 1.91(m)                    | 30.4         |
|      |                             | $\gamma$ CH <sub>2</sub>      | 1.65(m)                    | 26.7         |
|      |                             | $\delta$ CH <sub>2</sub>      | 3.24(t)                    | 43.3         |
| 22   | ethanolamine                | 1CH <sub>2</sub>              | 3.82(t)                    | 60.5         |
|      |                             | 2CH <sub>2</sub>              | 3.14(t)                    | 44.1         |
| 23   | succinate                   | CH <sub>2</sub>               | 2.4(s)                     | 37.1         |
| 24   | tryptophan                  | $\alpha$ CH                   | 4.06(dd)                   | 57.9         |
|      |                             | $\beta$ CH <sub>2</sub>       | 3.48(dd)                   | 29.3         |
|      |                             | $\beta$ CH <sub>2</sub>       | 3.31(dd)                   | 29.3         |
|      |                             | $\delta$ CH                   | 7.33(s)                    | 127.9        |
|      |                             | $\epsilon'$ CH                | 7.26(m)                    | 124.7        |
|      |                             | $\zeta$ CH                    | 7.54(d)                    | 114.8        |
|      |                             | $\zeta'$ CH                   | 7.17(m)                    | 122          |
|      |                             | $\eta$ CH                     | 7.74(d)                    | 121.1        |
| 25   | cystathionine               | 2CH                           | 3.85(dt)                   | 56.6         |
|      |                             | 3CH <sub>2</sub>              | 2.15(m)                    | 32.6         |
|      |                             | 4CH <sub>2</sub>              | 2.73(m)                    | 30           |
|      |                             | 6CH <sub>2</sub>              | 3.11(m)                    | 34.9         |
|      |                             | 7CH <sub>2</sub>              | 3.95(dt)                   | 56.4         |
| 26   | choline                     | 1CH <sub>2</sub>              | 3.52(dd)                   | 70.3         |
|      |                             | 2CH <sub>2</sub>              | 4.06(m)                    | 57.9         |
|      |                             | CH <sub>3</sub>               | 3.2(s)                     | 56.7         |

| keys | metabolites              | moieties            | $\delta 1H$ (multiplicity) | $\delta 13C$ |
|------|--------------------------|---------------------|----------------------------|--------------|
| 27   | phosphorylcholine        | 1CH <sub>2</sub>    | 3.6(m)                     | 69.3         |
|      |                          | 2CH <sub>2</sub>    | 4.16(m)                    | 60.9         |
|      |                          | CH <sub>3</sub>     | 3.21(s)                    | 56.7         |
| 28   | GPC                      | 1,2CH <sub>2</sub>  | 3.91(m)                    | #            |
|      |                          | 1',3CH <sub>2</sub> | 3.68(m)                    | #            |
|      |                          | 2'CH <sub>2</sub>   | 4.34(m)                    | 68.9         |
|      |                          | CH <sub>3</sub>     | 3.21(s)                    | 56.9         |
| 29   | 3-phosphoglyceric acid   | 2CH                 | 4.2(dd)                    | 75.8         |
|      |                          | 3CH <sub>2</sub>    | 3.87(m)                    | 69.7         |
|      |                          | 3CH <sub>2</sub>    | 4.03(m)                    | 69.7         |
| 30   | betaine                  | CH <sub>2</sub>     | 3.9(s)                     | 69           |
|      |                          | CH <sub>3</sub>     | 3.26(s)                    | 56.2         |
| 31   | glycerol-3-phosphate     | 1CH <sub>2</sub>    | 3.61(dd)                   | 64.8         |
|      |                          | 1CH <sub>2</sub>    | 3.67(dd)                   | 64.8         |
|      |                          | 2CH                 | 3.82(m)                    | 74.2         |
|      |                          | 3CH <sub>2</sub>    | 3.82(m)                    | 67.7         |
| 32   | glycerol                 | 1,3CH <sub>2</sub>  | 3.65(m)                    | 65.4         |
|      |                          | 1,3 CH <sub>2</sub> | 3.77(m)                    | 65.4         |
|      |                          | CH                  | 3.55(m)                    | 75           |
| 33   | 3-hydroxyisobutyric acid | 2CH                 | 2.47(m)                    | 47.7         |
|      |                          | 3CH <sub>2</sub>    | 3.52(m)                    | 67.6         |
|      |                          | 3CH <sub>2</sub>    | 3.70(m)                    | 67.6         |
|      |                          | CH <sub>3</sub>     | 1.06(d)                    | 16.9         |
| 34   | trehalose                | 1,1'CH              | 5.19(d)                    | 96.078       |
|      |                          | 2,2'CH              | 3.64(dd)                   | 73.884       |
|      |                          | 4,4'CH              | 3.45(t)                    | 72.537       |
| 35   | fumarate                 | CH                  | 6.51(s)                    | 138          |
| 36   | O-phosphoethanolamine    | 1CH <sub>2</sub>    | 3.96(m)                    | 63.1         |
|      |                          | 2CH <sub>2</sub>    | 3.21(t)                    | 43.5         |
| 37   | uracil                   | 5CH                 | 5.81(d)                    | 103.8        |
|      |                          | 6CH                 | 7.52(d)                    | 146.3        |
| 38   | GSSG                     | 2CH                 | 3.77(m)                    | 56.9         |
|      |                          | 3CH <sub>2</sub>    | 2.14(q)                    | 29.2         |
|      |                          | 4CH <sub>2</sub>    | 2.54(m)                    | 34.2         |
|      |                          | 7CH <sub>2</sub>    | 4.77(dd)                   | 55.5         |
|      |                          | 10CH <sub>2</sub>   | 3.77(m)                    | 46.3         |
|      |                          | 12CH <sub>2</sub>   | 3.3(dd)                    | 41.6         |
|      |                          | 12CH <sub>2</sub>   | 2.97(dd)                   | 41.6         |
|      |                          | 2CH                 | 8.92(s)                    | 150.4        |
| 39   | niacinamide              | 4CH                 | 8.24(dd)                   | 139.2        |
|      |                          | 5CH                 | 7.58(dd)                   | 126.8        |
|      |                          | 6CH                 | 8.70(dd)                   | 154.5        |
| 40   | formic acid              | CH                  | 8.45(s)                    | 172.4        |
| 41   | allantoin                | CH                  | 5.39(s)                    | 66.2         |
| 42   | malate                   | 2CH                 | 4.29(dd)                   | 73.4         |
|      |                          | 3CH <sub>2</sub>    | 2.66(dd)                   | 45.6         |
|      |                          | 3CH <sub>2</sub>    | 2.35(dd)                   | 45.6         |
| 43   | 3-aminoisobutyric acid   | 2CH                 | 2.6(m)                     | 42.3         |
|      |                          | 3CH <sub>2</sub>    | 3.05(dd)                   | 45.2         |
|      |                          | 3HC <sub>2</sub>    | 3.09(dd)                   | 45.2         |
|      |                          | CH <sub>3</sub>     | 1.19(d)                    | 18           |
| 44   | pyroglutamic acid        | 2CH                 | 4.17(dd)                   | 60.9         |
|      |                          | 3CH <sub>2</sub>    | 2.51(m)                    | 28.2         |
|      |                          | 3CH <sub>2</sub>    | 2.02(m)                    | 28.2         |
|      |                          | 4CH <sub>2</sub>    | 2.4(m)                     | 32.6         |
| 45   | N-acetyl glutamic acid   | CH <sub>3</sub>     | 1.98(s)                    |              |

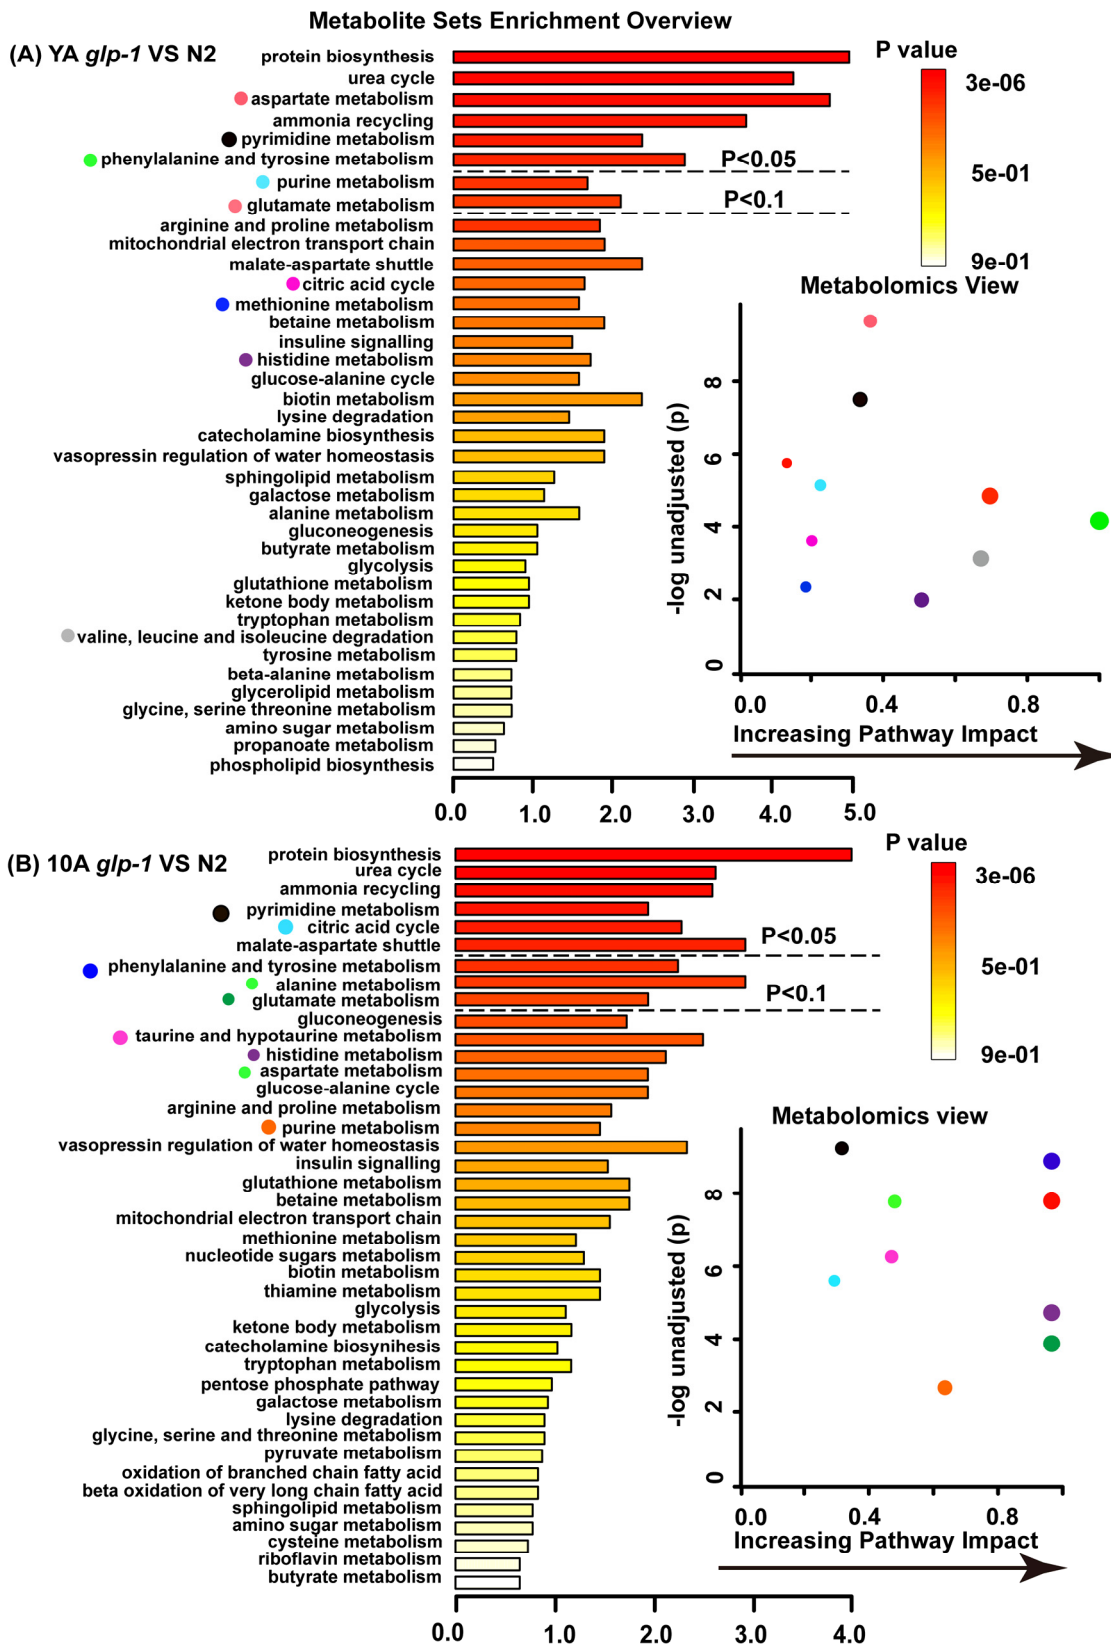

**Figure S2. Pathway analysis for *glp-1* against wild-type.** Summary plot for metabolite enrichment analysis(MSEA) (left panel) and metabolome view as discussed in Figure 2A, which showed the different metabolites when *glp-1* compared with N2 in young adult (A) and days 10 of adulthood (B). Detailed description showed in the Figure 2A.

**Table S2. Summary metabolite variations with age in WT, *glp-1(e2141)*, and *daf-16(mu86);glp-1(e2141)* double mutants.**

| metabolites                                     | N2 10A VS YA   |          | <i>glp-1</i> 10A VS YA |         | <i>daf-16;glp-1</i> 10A VS YA |         |
|-------------------------------------------------|----------------|----------|------------------------|---------|-------------------------------|---------|
|                                                 | <i>P</i> value | Change   | <i>P</i> value         | Change  | <i>P</i> value                | Change  |
| cystathionine <sup>*LC</sup>                    | <0.0001        | -0.8536  | <0.0001                | -0.9591 | <0.0001                       | -0.9772 |
| cytidine <sup>*LC</sup>                         | <0.0001        | -0.5624  | 0.0101                 | -0.5987 | 0.0301                        | -0.3184 |
| dUMP <sup>*LC</sup>                             | 0.0549         | -0.2056  | <0.0001                | -0.5007 | 0.0002                        | -0.5052 |
| oxidized glutathione <sup>*LC</sup>             | 0.0085         | 0.7389   | 0.0390                 | 0.4531  | 0.0321                        | 0.3816  |
| glycine <sup>*LC &amp; NMR</sup>                | 0.0010         | -0.8517  | 0.0002                 | -0.9266 | <0.0001                       | -0.8778 |
| hypotaurine <sup>*LC</sup>                      | <0.0001        | -0.4369  | <0.0001                | -0.6298 | <0.0001                       | -0.6381 |
| glutamate <sup>*LC &amp; NMR</sup>              | <0.0001        | -0.7660  | <0.0001                | -0.8488 | <0.0001                       | -0.8427 |
| glutamine <sup>*LC &amp; NMR</sup>              | <0.0001        | -0.5738  | <0.0001                | -0.8334 | 0.0007                        | -0.8028 |
| malate <sup>*LC &amp; NMR</sup>                 | 0.0002         | 0.6807   | 0.3496                 | 0.0530  | 0.0435                        | 0.3418  |
| serine <sup>*LC &amp; NMR</sup>                 | <0.0001        | -0.6832  | <0.0001                | -0.8048 | 0.0005                        | -0.8294 |
| taurine <sup>*LC</sup>                          | <0.0001        | -0.8990  | <0.0001                | -0.8495 | 0.1393                        | -0.3810 |
| taurocholate <sup>*LC</sup>                     | <0.0001        | 2.0653   | <0.0001                | 2.4940  | 0.0157                        | 0.4020  |
| thymine <sup>*LC</sup>                          | <0.0001        | -0.7643  | <0.0001                | -0.8712 | <0.0001                       | -0.9298 |
| citrate <sup>*LC &amp; NMR</sup>                | 0.0002         | 0.4102   | 0.0001                 | 0.3591  | <0.0001                       | 0.5374  |
| fumarate <sup>*LC &amp; NMR</sup>               | 0.0002         | -0.3579  | 0.5667                 | 0.0351  | 0.0815                        | -0.1645 |
| glutathione <sup>*LC &amp; NMR</sup>            | 0.0025         | -0.2632  | <0.0001                | -0.5580 | 0.0781                        | -0.3395 |
| arginine <sup>*LC &amp; NMR</sup>               | <0.0001        | 0.6144   | 0.0001                 | 0.1869  | 0.0967                        | 0.0654  |
| histidine <sup>*LC &amp; NMR</sup>              | <0.0001        | 0.7263   | <0.0001                | 0.2787  | <0.0001                       | -0.3609 |
| threonine <sup>*LC &amp; NMR</sup>              | <0.0001        | 0.7598   | <0.0001                | 0.3656  | <0.0001                       | -0.2541 |
| aspartate <sup>*LC &amp; NMR</sup>              | 0.1261         | 0.1738   | <0.0001                | 0.6463  | 0.0011                        | -0.1360 |
| oxaloacetate <sup>*LC</sup>                     | 0.0185         | 0.1871   | <0.0001                | 0.9707  | 0.0100                        | 0.2146  |
| leucine <sup>*LC &amp; NMR</sup>                | <0.0001        | -0.4603  | <0.0001                | -0.4824 | <0.0001                       | -0.6050 |
| isoleucine <sup>*LC &amp; NMR</sup>             | 0.0002         | -0.3076  | <0.0001                | -0.3752 | <0.0001                       | -0.4152 |
| valine <sup>*LC &amp; NMR</sup>                 | 0.0213         | -0.1947  | 0.0002                 | -0.3366 | 0.0003                        | -0.3629 |
| 3-aminoisobutyric acid <sup>*LC &amp; NMR</sup> | <0.0001        | -0.6261  | <0.0001                | -0.4931 | <0.0001                       | -0.7728 |
| alanine <sup>*LC &amp; NMR</sup>                | 0.0008         | -0.3545  | <0.0001                | -0.5765 | <0.0001                       | -0.6421 |
| asparagine <sup>*LC &amp; NMR</sup>             | 0.1261         | 0.1738   | <0.0001                | 0.6463  | 0.0011                        | -0.1360 |
| succinate <sup>*LC &amp; NMR</sup>              | <0.0001        | -0.6252  | <0.0001                | -0.7173 | <0.0001                       | -0.6711 |
| lysine <sup>*LC &amp; NMR</sup>                 | 0.1987         | 0.1468   | 0.0001                 | -0.4218 | <0.0001                       | -0.3101 |
| phosphorylcholine <sup>*LC &amp; NMR</sup>      | 0.8637         | 0.0835   | 0.0006                 | 3.0821  | 0.0991                        | 0.7429  |
| trehalose <sup>*LC &amp; NMR</sup>              | <0.0001        | 1.7455   | <0.0001                | 1.1126  | <0.0001                       | 0.8642  |
| Phenylalanine <sup>*LC &amp; NMR</sup>          | 0.2481         | -0.1056  | 0.0074                 | -0.2568 | 0.3301                        | -0.0689 |
| isocitric acid <sup>*LC</sup>                   | 0.0002         | 0.7665   | <0.0001                | 1.2223  | <0.0001                       | 0.8032  |
| ADP <sup>*LC</sup>                              | 0.0008         | -0.44527 | 0.003689               | -0.4256 | 0.0034                        | -0.4413 |
| AMP <sup>*LC</sup>                              | 0.0003         | -0.79027 | <0.0001                | -0.7351 | 0.0205                        | -0.7389 |
| allantoin <sup>*LC &amp; NMR</sup>              | 0.0076         | -0.522   | 0.0464                 | -0.207  | 0.0003                        | -0.652  |
| CDP <sup>*LC</sup>                              | <0.0001        | -0.574   | <0.0001                | -0.5013 | 0.0125                        | -0.4269 |

| metabolites                               | N2 10A VS YA   |          | <i>glp-1</i> 10A VS YA |         | <i>daf-16;glp-1</i> 10A VS YA |          |
|-------------------------------------------|----------------|----------|------------------------|---------|-------------------------------|----------|
|                                           | <i>P</i> value | Change   | <i>P</i> value         | Change  | <i>P</i> value                | Change   |
| UMP <sup>*LC</sup>                        | <0.0001        | -0.629   | 0.3976                 | -0.1236 | 0.0114                        | -0.557   |
| CTP <sup>*LC</sup>                        | 0.741          | 0.053    | 0.2067                 | 0.002   | 0.0274                        | -0.255   |
| uracil <sup>*LC</sup>                     | 0.037          | -0.29078 | 0.8383                 | 0.0297  | <0.0001                       | -0.53545 |
| $\beta$ -alanine <sup>*LC &amp; NMR</sup> | 0.0217         | -0.2163  | 0.5291                 | 0.0453  | 0.5086                        | -0.0774  |

Asteriks (\*) denotes metabolites are verified by reference standards. Superscript letter LC indicated metabolites were detected with UPLC-MS platforms. *P* values were calculated by Mann-Whitney U test, and the *p*-value of 0.05 or less was considered significant. All statistical were calculated by using SPSS package.

**Table S3. List of altered metabolites of each mutant strains against the wild type in young adults.**

| metabolites ( young adult)                       | <i>P</i> value<br><i>glp-1</i> VS N2 | <i>P</i> value<br><i>daf-16;glp-1</i> VS N2 |
|--------------------------------------------------|--------------------------------------|---------------------------------------------|
| 2-oxoglutarate <sup>*LC</sup>                    | 0.014                                | 0.003                                       |
| 2-oxosuccinamate <sup>*LC</sup>                  | 0.041                                | 0.184                                       |
| 3-aminoisobutanoic acid <sup>*LC &amp; NMR</sup> | 0.0191                               | 0.0904                                      |
| 3-hydroxydodecanoic acid <sup>*LC</sup>          | 0.231                                | 0.732                                       |
| 3-indolepropionic acid <sup>*LC</sup>            | 0.468                                | 0.003                                       |
| 3-sulfinoalanine <sup>*LC</sup>                  | 0.035                                | <0.0001                                     |
| 5-hydroxy-L-tryptophan                           | <0.0001                              | <0.0001                                     |
| 6-succinoaminopurine <sup>*LC</sup>              | 0.001                                | <0.0001                                     |
| 9-hexadecenoylcarnitine <sup>*LC</sup>           | 0.03                                 | 0.048                                       |
| adenine <sup>*LC</sup>                           | 0.021                                | 0.792                                       |
| adenosine <sup>*LC</sup>                         | 0.024                                | <0.0001                                     |
| ADP <sup>*LC</sup>                               | 0.048                                | 0.001                                       |
| alanine <sup>*LC &amp; NMR</sup>                 | <0.0001                              | <0.0001                                     |
| allantoin <sup>*LC &amp; NMR</sup>               | <0.0001                              | <0.0001                                     |
| alpha-aminobutyric acid <sup>*NMR</sup>          | 0.025                                | 0.235                                       |
| alpha-lactose <sup>*LC</sup>                     | <0.0001                              | 0.166                                       |
| AMP <sup>*LC</sup>                               | 0.007                                | 0.391                                       |
| androsterone <sup>*LC</sup>                      | 0.553                                | 0.025                                       |
| arginine <sup>*LC &amp; NMR</sup>                | 0.006                                | 0.007                                       |
| argininosuccinic acid <sup>*LC</sup>             | 0.048                                | <0.0001                                     |
| ascorbate <sup>*LC</sup>                         | 0.323                                | 0.002                                       |
| asparagine <sup>*LC &amp; NMR</sup>              | 0.429                                | 0.001                                       |
| aspartate <sup>*LC &amp; NMR</sup>               | <0.0001                              | <0.0001                                     |
| atenolol <sup>*LC</sup>                          | 0.429                                | 0.692                                       |
| betaine <sup>*LC &amp; NMR</sup>                 | 0.119                                | 0.931                                       |
| biotin <sup>*LC</sup>                            | 0.029                                | 0.063                                       |
| cAMP <sup>*LC</sup>                              | 0.439                                | <0.0001                                     |
| carnitine <sup>*LC</sup>                         | 0.025                                | 0.021                                       |
| CDP-choline/Citicoline <sup>*LC</sup>            | 0.048                                | 0.099                                       |
| choline <sup>*LC &amp; NMR</sup>                 | 0.03                                 | 0.262                                       |

| metabolites ( young adult)      | <i>P</i> value<br><i>glp-1</i> VS N2 | <i>P</i> value<br><i>daf-16;glp-1</i> VS N2 |
|---------------------------------|--------------------------------------|---------------------------------------------|
| citrulline *LC                  | 0.007                                | 0.003                                       |
| creatinine *LC                  | <0.0001                              | <0.0001                                     |
| cystathionine *LC & NMR         | 0.573                                | 0.239                                       |
| cysteate *LC                    | 0.041                                | 0.391                                       |
| cysteine *LC                    | 0.742                                | <0.0001                                     |
| cytidine *LC                    | <0.0001                              | <0.0001                                     |
| cytosine *LC                    | <0.0001                              | 0.147                                       |
| deoxyadenosine *LC              | 0.086                                | 0.644                                       |
| deoxycorticosterone *LC         | 0.692                                | 0.012                                       |
| D-fructose 6-phosphate *LC      | 0.51                                 | 0.598                                       |
| D-glucosamine *LC               | 0.006                                | 0.005                                       |
| D-gluconic acid *LC             | 0.159                                | 0.342                                       |
| D-glucose *LC                   | <0.0001                              | 0.009                                       |
| dUMP *LC                        | 0.573                                | <0.0001                                     |
| D-xylonate *LC                  | 0.114                                | 0.008                                       |
| ethanolamine phosphate *LC      | 0.356                                | 0.005                                       |
| FMN *LC                         | 0.439                                | 0.011                                       |
| fumarate *LC & NMR              | 0.011                                | 0.044                                       |
| gamma glutamyl ornithine *LC    | 0.51                                 | 0.048                                       |
| gamma-aminobutyric acid *LC     | 0.166                                | 0.51                                        |
| glucosamine *LC                 | 0.015                                | 0.007                                       |
| glucose 6-phosphate *LC         | 0.049                                | 0.002                                       |
| glutamine *LC & NMR             | 0.002                                | 0.0968                                      |
| glutamate *LC & NMR             | 0.005                                | 0.001                                       |
| glutathione *LC                 | 0.0105                               | <0.0001                                     |
| glyceric acid *LC               | 0.235                                | 0.012                                       |
| glycerol *LC & NMR              | 0.005                                | 0.018                                       |
| glycerol-3-phosphate *LC & NMR  | <0.0001                              | <0.0001                                     |
| glycerophosphocholine *LC & NMR | 0.345                                | 0.196                                       |
| guanosine *LC                   | <0.0001                              | 0.001                                       |
| hexadecenal *LC                 | <0.0001                              | 0.429                                       |
| histidine *LC & NMR             | 0.002                                | 0.018                                       |
| homocarnosine *LC               | 0.356                                | <0.0001                                     |
| hydroxypyruvate *LC             | 0.778                                | 0.007                                       |
| hypotaurine *LC                 | 0.048                                | 0.01                                        |
| hypoxanthine *LC                | 0.398                                | 0.007                                       |
| IMP *LC                         | 0.001                                | 0.391                                       |
| inosine *LC                     | 0.526                                | 0.849                                       |
| isocitric acid *LC              | 0.262                                | 0.001                                       |
| isoleucine *LC & NMR            | 0.0099                               | 0.0166                                      |
| kynurenine *LC                  | 0.099                                | 0.021                                       |
| leucine *LC & NMR               | <0.0001                              | 0.742                                       |
| leukotriene E4 *LC              | 0.888                                | 0.006                                       |
| lysine *LC & NMR                | 0.099                                | 0.075                                       |
| malate *LC & NMR                | 0.007                                | 0.077                                       |
| mannitol *LC                    | 0.018                                | 0.692                                       |

| <b>metabolites ( young adult)</b>                | <b><i>P</i> value<br/><i>glp-1</i> VS N2</b> | <b><i>P</i> value<br/><i>daf-16;glp-1</i> VS N2</b> |
|--------------------------------------------------|----------------------------------------------|-----------------------------------------------------|
| mannitol-1-phosphate * <sup>LC</sup>             | 0.356                                        | 0.323                                               |
| mannobiose * <sup>LC</sup>                       | <0.0001                                      | 0.468                                               |
| methionine * <sup>LC</sup> & NMR                 | 0.391                                        | 0.001                                               |
| N-acetyl-L-glutamate * <sup>LC</sup> & NMR       | <0.0001                                      | 0.001                                               |
| N-acetylmethionine * <sup>LC</sup>               | <0.0001                                      | 0.003                                               |
| N-acetylputrescine * <sup>LC</sup>               | 0.002                                        | <0.0001                                             |
| NAD+ * <sup>LC</sup>                             | 0.21                                         | 0.025                                               |
| O-butanoylcarnitine * <sup>LC</sup>              | 0.002                                        | 0.391                                               |
| O-phosphoethanolamine * <sup>LC</sup>            | 0.002                                        | 0.018                                               |
| orotate * <sup>LC</sup>                          | 0.778                                        | 0.03                                                |
| oxaloacetate * <sup>LC</sup>                     | 0.105                                        | 0.017                                               |
| palmitoylcarnitine * <sup>LC</sup>               | 0.025                                        | 0.129                                               |
| phenylacetaldehyde * <sup>LC</sup>               | 0.018                                        | 0.947                                               |
| phenylalanine * <sup>LC</sup> & NMR              | 0.041                                        | 0.425                                               |
| phosphorylcholine * <sup>LC</sup> & NMR          | 0.004                                        | 0.008                                               |
| proline * <sup>LC</sup> & NMR                    | 0.391                                        | 0.012                                               |
| purine * <sup>LC</sup>                           | 0.51                                         | 0.048                                               |
| pyrimidine * <sup>LC</sup>                       | <0.0001                                      | 0.021                                               |
| s-adenosyl-L-homocysteine * <sup>LC</sup>        | 0.01                                         | 0.742                                               |
| serine * <sup>LC</sup> & NMR                     | 0.006                                        | 0.044                                               |
| sn-glycero-3-phosphoethanolamine * <sup>LC</sup> | 0.003                                        | 0.356                                               |
| succinate * <sup>LC</sup> & NMR                  | 0.0003                                       | 0.518                                               |
| taurine * <sup>LC</sup>                          | 0.778                                        | 0.97                                                |
| taurocholate * <sup>LC</sup>                     | 0.187                                        | 0.025                                               |
| threonine * <sup>LC</sup> & NMR                  | 0.139                                        | 0.02                                                |
| thymine * <sup>LC</sup>                          | <0.0001                                      | 0.0685                                              |
| trehalose * <sup>LC</sup> & NMR                  | <0.0001                                      | 0.025                                               |
| tryptophan * <sup>LC</sup> & NMR                 | 0.468                                        | 0.003                                               |
| tyrosine * <sup>LC</sup> & NMR                   | 0.035                                        | 0.323                                               |
| urate * <sup>LC</sup>                            | <0.0001                                      | 0.025                                               |
| ureidosuccinic acid * <sup>LC</sup>              | 0.018                                        | 0.004                                               |
| uridine * <sup>LC</sup>                          | 0.008                                        | 0.01                                                |
| urocanic acid * <sup>LC</sup>                    | 0.742                                        | 0.035                                               |
| valine * <sup>LC</sup> & NMR                     | 0.03                                         | 0.895                                               |
| xanthurenic acid * <sup>LC</sup>                 | 0.006                                        | 0.553                                               |

Asteriks (\*) denotes metabolites are verified by reference standards. Superscript letter LC indicated metabolites were detected with UPLC-MS platforms. Metabolite abundance level were reflected using colors, and with yellow being lower and red higher when mutants VS. N2. *P* values were calculated by Mann-Whitney U test, and the *p*-value of 0.05 or less was considered significant. All statistical were calculated by using SPSS package.



**Table S4. List of altered metabolites of each mutant strains against the wild type in days 10 of adult worms.** Detailed description showed in the Table S3.

| metabolites (10-day-adult)         | <i>P</i> value<br><i>glp-1</i> VS N2 | <i>P</i> value<br><i>daf-16;glp-1</i> VS N2 |
|------------------------------------|--------------------------------------|---------------------------------------------|
| 2-hydroxyglutarate                 | <0.0001                              | <0.0001                                     |
| 3-aminoisobutanoic acid * LC & NMR | 0.0049                               | 0.0007                                      |
| 3-hydroxydodecanoic acid * LC      | 0.0008                               | 0.0003                                      |
| 3-indolepropionic acid * LC        | 0.1842                               | 0.0069                                      |
| 3-sulfinoalanine * LC              | 0.7728                               | <0.0001                                     |
| 4-aminobutanoate * LC              | <0.0001                              | <0.0001                                     |
| 5-hydroxy-L-tryptophan * LC        | 0.0001                               | <0.0001                                     |
| 6-succinoaminopurine * LC          | 0.0022                               | 0.0001                                      |
| acetamidopropanal * LC             | <0.0001                              | <0.0001                                     |
| acetylcarnitine * LC               | 0.0002                               | 0.3913                                      |
| adenine * LC                       | 0.0005                               | 0.7416                                      |
| ADP * LC                           | 0.0001                               | 0.0865                                      |
| alanine * LC & NMR                 | 0.366                                | 0.0283                                      |
| allantoin * LC & NMR               | <0.0001                              | 0.0001                                      |
| alpha-aminobutyric acid * NMR      | 0.0027                               | 0.0176                                      |
| alpha-Lactose * LC                 | 0.0567                               | 0.0479                                      |
| AMP * LC                           | 0.04189                              | 0.0069                                      |
| androsterone                       | 0.0012                               | 0.0176                                      |
| arginine * LC & NMR                | <0.0001                              | 0.0001                                      |
| asparagine * LC & NMR              | 0.9081                               | 0.0296                                      |
| aspartate * LC & NMR               | 0.0002                               | 0.0030                                      |
| atenolol                           | 0.0647                               | 0.0409                                      |
| betaine * LC & NMR                 | 0.0433                               | 0.0479                                      |
| cAMP * LC                          | <0.0001                              | 0.0001                                      |
| carnitine * LC                     | 0.0039                               | 0.0001                                      |
| CTP * LC                           | 0.0002                               | 0.0632                                      |
| CDP * LC                           | 0.0001                               | 0.0332                                      |
| CDP-choline/Citicoline * LC        | <0.0001                              | 0.0001                                      |
| CDP-ethanolamine * LC              | 0.9081                               | 0.0101                                      |
| choline * LC & NMR                 | 0.0130                               | 0.0750                                      |
| citrate * LC & NMR                 | 0.5254                               | 0.0205                                      |
| citrulline * LC                    | 0.5637                               | 0.0176                                      |
| creatine * LC                      | 0.0001                               | 0.4288                                      |
| cystathionine * LC & NMR           | 0.0000                               | 0.0001                                      |
| cysteate * LC                      | 0.0002                               | 0.0001                                      |
| cysteine * LC                      | 0.0032                               | 0.0101                                      |
| cytidine * LC                      | 0.0001                               | 0.0015                                      |
| deoxyadenosine * LC                | 0.0001                               | 0.0001                                      |
| D-fructose 6-phosphate * LC        | 0.0003                               | 0.0004                                      |
| dGDP * LC                          | 0.0067                               | 0.0210                                      |
| D-galactose * LC                   | 0.1842                               | 0.1661                                      |
| D-gluconate * LC                   | 0.0018                               | 0.0250                                      |
| D-gluconic acid * LC               | 0.0003                               | 0.0005                                      |
| D-glucosamine * LC                 | 0.0833                               | 0.0024                                      |
| D-glucosamine-6-phosphate * LC     | <0.0001                              | 0.0001                                      |
| D-glucose * LC                     | <0.0001                              | 0.0001                                      |
| D-ribose * LC                      | 0.2040                               | 0.6924                                      |
| dTMP * LC                          | 0.0153                               | 0.0001                                      |
| dUMP * LC                          | <0.0001                              | 0.0260                                      |
| D-xylonate * LC                    | 0.1190                               | 0.0409                                      |
| ethanolamine phosphate * LC        | 0.0015                               | 0.0003                                      |
| FMN * LC                           | 0.0005                               | 0.0250                                      |
| fumarate * LC & NMR                | 0.4884                               | 0.0349                                      |
| gamma glutamyl ornithine * LC      | 0.3865                               | 0.0030                                      |
| GDP * LC                           | 0.0567                               | 0.0349                                      |
| glucosamine * LC                   | 0.0001                               | 0.2353                                      |
| glucose 6-phosphate * LC           | <0.0001                              | 0.1469                                      |

| metabolites (10-day-adult)           | P value<br><i>glp-1</i> VS N2 | P value<br><i>daf-16;glp-1</i> VS N2 |
|--------------------------------------|-------------------------------|--------------------------------------|
| glycerophosphocholine *LC & NMR      | 0.0094                        | 0.1294                               |
| glycine *LC & NMR                    | 0.5254                        | 0.0001                               |
| GMP *LC                              | 0.0153                        | 0.0008                               |
| guanine *LC                          | 0.0001                        | 0.0001                               |
| guanosine *LC                        | <0.0001                       | 0.0001                               |
| hexadecenal *LC                      | 0.0094                        | 0.0001                               |
| hexanoylcarnitine *LC                | <0.0001                       | 0.0001                               |
| hippuric acid *LC                    | 0.2987                        | 0.0003                               |
| histamine *LC                        | 0.0018                        | 0.0037                               |
| histidine *LC                        | <0.0001                       | 0.0001                               |
| homocarnosine *LC                    | <0.0001                       | 0.0001                               |
| hypotaurine *LC                      | <0.0001                       | 0.0001                               |
| hypoxanthine *LC                     | 0.0327                        | 0.0122                               |
| IMP *LC                              | 0.0327                        | 0.0016                               |
| indoleacetic acid *LC                | 0.6442                        | 0.0004                               |
| inosine *LC                          | <0.0001                       | 0.0001                               |
| isocitric acid *LC                   | 0.0328                        | 0.0018                               |
| isoleucine *LC & NMR                 | 0.0001                        | 0.0008                               |
| kynurenic acid *LC                   | <0.0001                       | 0.2103                               |
| kynurenine *LC                       | 0.0001                        | 0.0001                               |
| leucine *LC & NMR                    | 0.0111                        | 0.0197                               |
| leukotriene E4 *LC                   | 0.0153                        | 0.0349                               |
| lysine *LC & NMR                     | <0.0001                       | 0.2353                               |
| malate *LC & NMR                     | 0.5637                        | 0.0257                               |
| mannitol-1-phosphate *LC             | 0.3865                        | 0.0993                               |
| mannobiose *LC                       | 0.6861                        | 0.5097                               |
| methionine *LC & NMR                 | 0.0002                        | 0.0001                               |
| N6-acetyl-L-lysine *LC               | 0.2253                        | 0.0002                               |
| N-acetyl-D-glucosamine *LC           | 0.0153                        | 0.0001                               |
| N-acetyl-L-glutamate *LC & NMR       | <0.0001                       | 0.0001                               |
| N-acetyl-L-leucine *LC               | 0.0567                        | 0.0012                               |
| N-acetylmethionine *LC               | 0.0377                        | 0.3913                               |
| N-acetylputrescine *LC               | 0.2987                        | 0.0016                               |
| NAD+ *LC                             | 0.0496                        | 0.0001                               |
| NADH *LC                             | 0.0002                        | 0.0122                               |
| nicotinate *LC                       | 0.4189                        | 0.3913                               |
| octanoylcarnitine *LC                | 0.0039                        | 0.0006                               |
| O-phosphoethanolamine *LC & NMR      | 0.0153                        | 0.0010                               |
| ornithine *LC                        | 0.0002                        | 0.0001                               |
| oxaloacetate *LC                     | <0.0001                       | 0.0072                               |
| palmitoylcarnitine *LC               | 0.0047                        | 0.0046                               |
| phenylacetaldehyde *LC               | 0.0001                        | 0.0016                               |
| phenylalanine *LC                    | 0.0032                        | 0.0001                               |
| phenylpyruvic acid *LC               | <0.0001                       | 0.0001                               |
| phosphorylcholine *LC & NMR          | <0.0001                       | 0.0069                               |
| proline *LC & NMR                    | <0.0001                       | 0.0001                               |
| purine *LC                           | <0.0001                       | 0.0001                               |
| pyrimidine *LC                       | 0.0001                        | 0.0001                               |
| pyroglutamic acid *LC & NMR          | <0.0001                       | 0.0001                               |
| s-adenosyl-L-homocysteine *LC        | <0.0001                       | 0.0012                               |
| serine *LC & NMR                     | 0.0067                        | 0.0001                               |
| sn-glycero-3-phosphoethanolamine *LC | 0.0008                        | 0.0024                               |
| spermidine *LC                       | <0.0001                       | 0.0001                               |
| succinate *LC & NMR                  | 0.0001                        | 0.0497                               |
| taurine *LC                          | 0.7728                        | 0.0037                               |
| thiamine *LC                         | 0.6033                        | 0.0004                               |
| threonine *LC & NMR                  | <0.0001                       | 0.0001                               |
| thymine *LC                          | 0.0002                        | 0.0001                               |
| trehalose *LC & NMR                  | 0.2987                        | 0.0001                               |
| tyramine *LC                         | <0.0001                       | 0.0001                               |
| tyrosine *LC & NMR                   | 0.0008                        | 0.0003                               |

| <b>metabolites (10-day-adult)</b>             | <b><i>P</i> value<br/><i>glp-1</i> VS N2</b> | <b><i>P</i> value<br/><i>daf-16;glp-1</i> VS N2</b> |
|-----------------------------------------------|----------------------------------------------|-----------------------------------------------------|
| UMP* <sup>LC</sup>                            | 0.009                                        | 0.6442                                              |
| uracil* <sup>LC</sup>                         | 0.0002                                       | 0.7253                                              |
| urate* <sup>LC</sup>                          | 0.0433                                       | 0.0008                                              |
| valine* <sup>LC &amp; NMR</sup>               | 0.0209                                       | 0.0001                                              |
| xanthine* <sup>LC</sup>                       | <0.0001                                      | 0.0001                                              |
| xanthosine* <sup>LC</sup>                     | <0.0001                                      | 0.0001                                              |
| xanthurenic acid* <sup>LC</sup>               | 0.0022                                       | 0.0101                                              |
| oxidized glutathione* <sup>LC &amp; NMR</sup> | 0.0001                                       | 0.0001                                              |
